# Supplementary material for: Diverse chemically recyclable polymers obtained by cationic vinyl and ring-opening polymerizations of the cyclic ketene acetal ester “dehydroaspirin”
Source: Royal Society of Chemistry journal article supplement (doi:10.1039/d2py01181f), 2022-01-01
Supplement: d2py01181f1.pdf [file d2py01181f1.pdf]

## Diverse Chemically Recyclable Polymers by Cationic Vinyl and Ring-Opening Polymerizations of Cyclic Ketene Acetal Ester “Dehydroaspirin”

Akane Kazama,<sup>a</sup> Yasuhiro Kohsaka<sup>a, b,\*</sup>

(<sup>a</sup>Faculty of Textile Science and Technology, Shinshu University, <sup>b</sup>Research Initiative for Supra-Materials (RISM), Shinshu University)

3-15-1 Tokida, Ueda, Nagano 386-8567, JAPAN; Tel +81-268-21-5488; e-mail kohsaka@shinshu-u.ac.jp

### Electronic Supplementary Information

#### Proposed mechanism

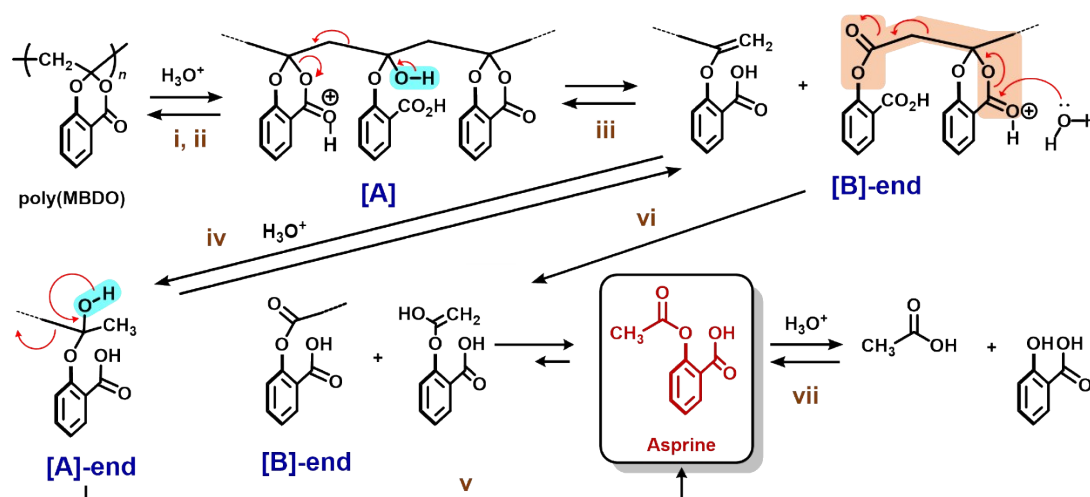

- i. A formation of hemiacetal [A] via hydrolysis of hemiacetal ester .
- ii. Protonation of the carbonyl group in neighboring unit.
- iii. Decomposition of hemiacetal [A] accompanying with main chain scission.
- iv. The formed exo-methylene accepts water addition to form hemiacetal [A]-end
- v. Elimination of aspirin from [A]-end
- vi. Hydrolysis of ester [B]-end to a similar [B]-end and aspirin in enol-form.
- vii. Hydrolysis of aspirin to acetic acid and salicylic acid

**Scheme S1.** Proposed mechanism of degradation of MBDO vinyl polymer.

**Table S1.** Radical copolymerization of MBDO and MMA initiated by AIBN in toluene at 60 °C

| Entry <sup>a</sup> | Feed <sup>b</sup>              |                                | <i>F</i> | Time<br>[min] | Conv. [%] <sup>b</sup> |                   |      | Yield [%] <sup>c</sup> |                   | <i>f</i> | $\overline{F^2}$ | $\overline{f}$ | $\alpha$ | $\eta$ | $\xi$ |
|--------------------|--------------------------------|--------------------------------|----------|---------------|------------------------|-------------------|------|------------------------|-------------------|----------|------------------|----------------|----------|--------|-------|
|                    | MBDO                           | MMA                            |          |               | MBDO                   | MMA               | AV   |                        |                   |          |                  |                |          |        |       |
|                    | [M <sub>1</sub> ] <sub>0</sub> | [M <sub>2</sub> ] <sub>0</sub> |          |               | [M <sub>1</sub> ]      | [M <sub>2</sub> ] |      | [M <sub>1</sub> ]      | [M <sub>2</sub> ] |          |                  |                |          |        |       |
| S1                 | 90.8                           | 9.16                           | 9.92     | 60            | 5.81                   | 38.5              | 22.1 | 2.10                   | 50.8              | 49.2     | 1.03             | 95.3           |          | 0.0029 | 0.941 |
| S2                 | 70.9                           | 29.1                           | 2.43     | 120           | 4.56                   | 36.9              | 20.7 | 5.06                   | 29.2              | 70.8     | 0.412            | 14.3           |          | -0.171 | 0.707 |
| S3                 | 51.4                           | 48.6                           | 1.06     | 180           | 1.00                   | 30.5              | 15.7 | 11.8                   | 16.8              | 83.2     | 0.202            | 5.55           | 5.95     | -0.340 | 0.320 |
| S4                 | 31.6                           | 68.4                           | 0.462    | 180           | 1.27                   | 28.8              | 15.0 | 18.6                   | 10.4              | 89.6     | 0.116            | 1.85           |          | -0.454 | 0.237 |
| S5                 | 10.4                           | 89.6                           | 0.116    | 180           | 7.72                   | 33.4              | 20.5 | 20.5                   | 3.47              | 96.5     | 0.0360           | 0.371          |          | -0.490 | 0.059 |

<sup>a</sup> [Monomer]<sub>0</sub>/[AIBN]<sub>0</sub> = 1/0.02., [M]= 1M. <sup>b</sup> Determined by <sup>1</sup>H NMR (400 MHz, CDCl<sub>3</sub>, 25 °C). <sup>c</sup> [Yield] = [Polymer Weight] / [Monomer Weight] × 100

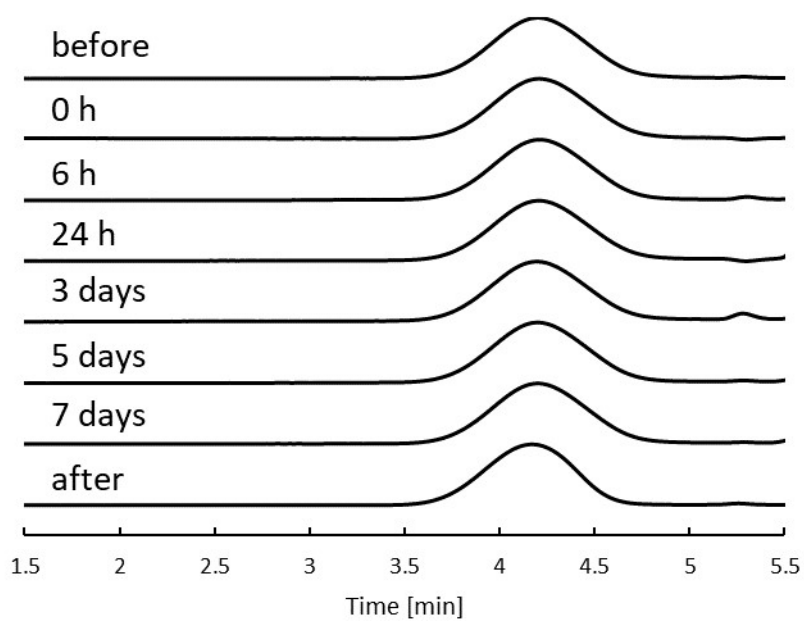

**Figure S1.** SEC spectra of acid hydrolysis of poly(MBDO-co-MMA). (40 °C, THF)

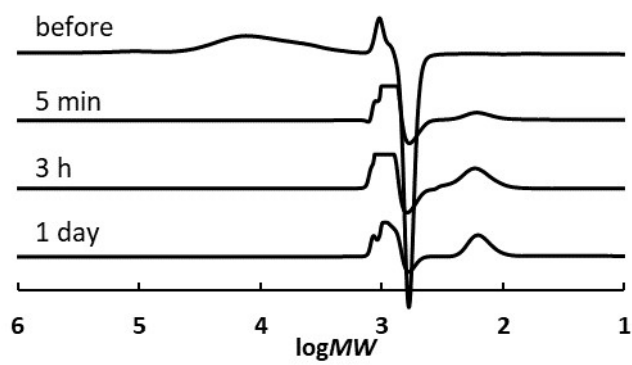

**Figure S2.** SEC spectra at each reaction time of base hydrolysis of vinyl poly(MBDO). (40 °C, DMF)

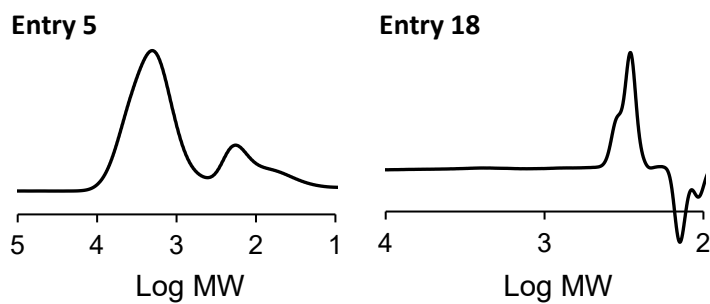

**Figure S3.** SEC curves of Entry 5 and 18 in Table 2. Entry 5 is THF-soluble fraction.

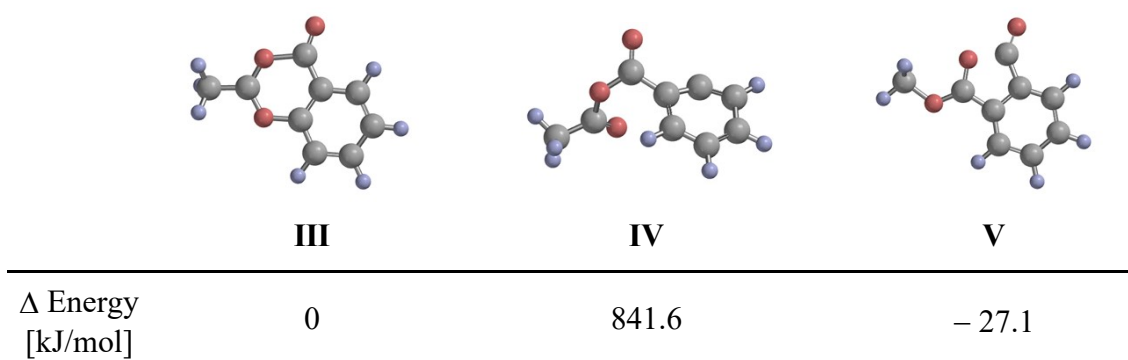

**Figure S4.** Structure of hemiacetal ester cation predicted by DFT calculation (B3LYP 6-31+G\*).

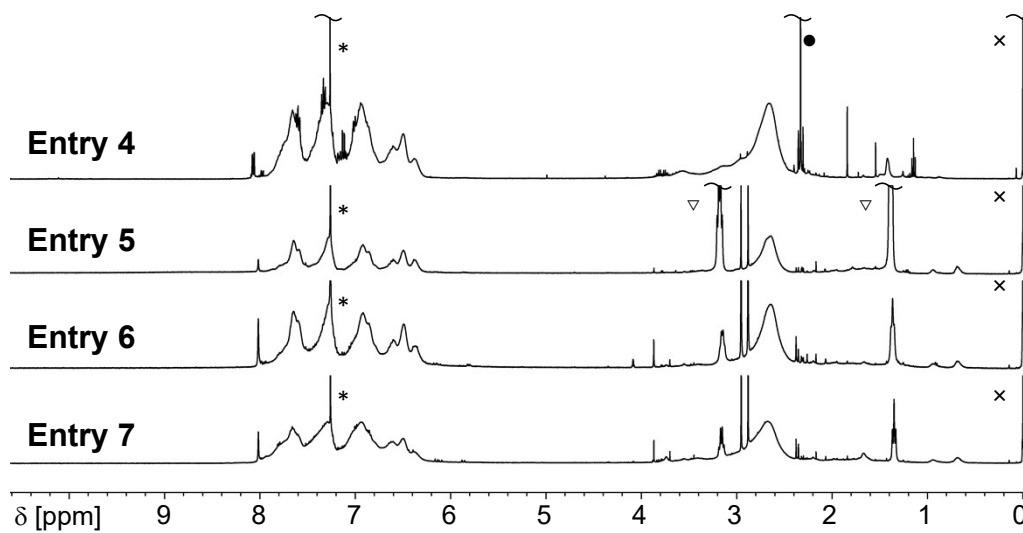

**Figure S5.**  $^1\text{H}$  NMR spectra of cationic polymerization of MBDO initiated by  $\text{BF}_3\text{Et}_2\text{O}$  and IBVE-OAc. (400 MHz, 26 °C,  $\text{CDCl}_3$ ).

\*:  $\text{CHCl}_3$ , •: Acetone, ▽: diethyl ether, x: TMS.

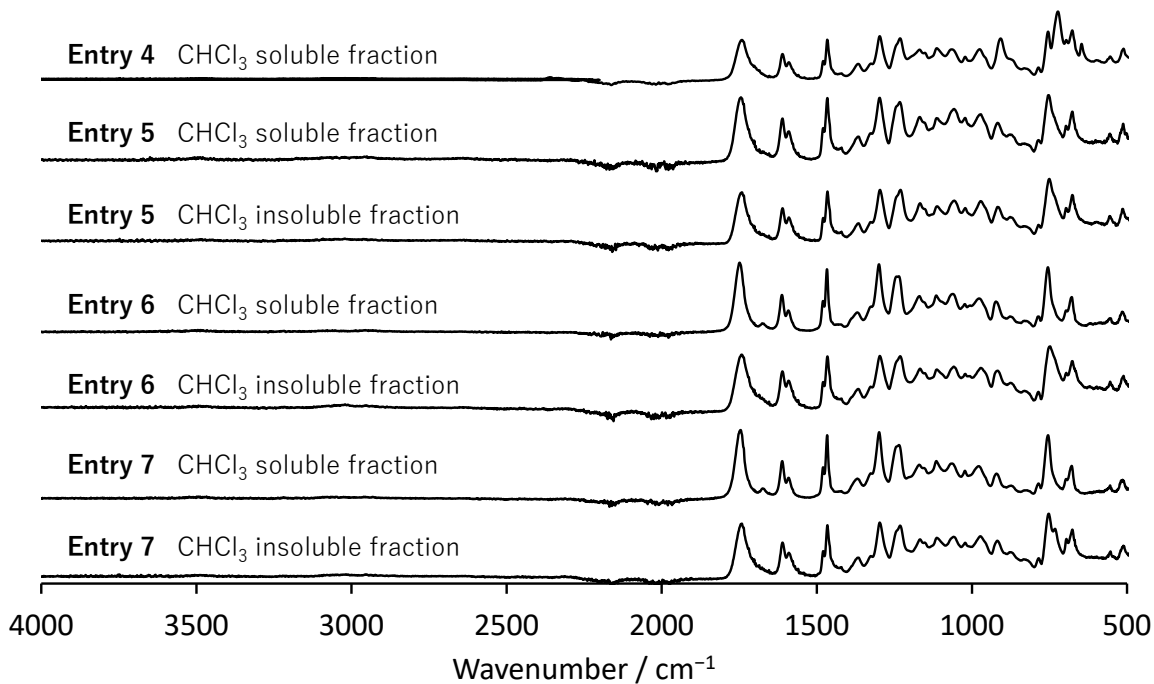

**Figure S6.** IR spectra of  $\text{CHCl}_3$  soluble and insoluble fraction of Entries 0-3.

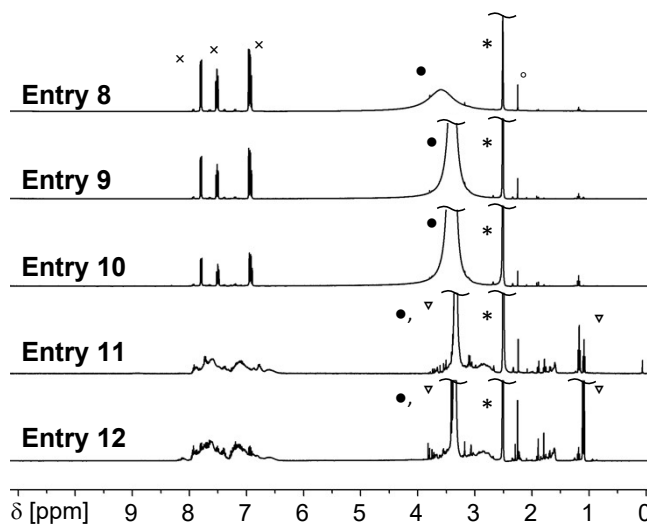

**Figure S7.**  $^1\text{H}$  NMR spectra of cationic polymerization of MBDO initiated by IBVE-OAc,  $\text{ZnCl}_2$  and ethyl acetate (400 MHz, 26 °C,  $\text{DMSO}-d_6$ ). \*:DMSO, •:water, °:acetic acid, ▽ :diethyl ether, x: salicylic acid.

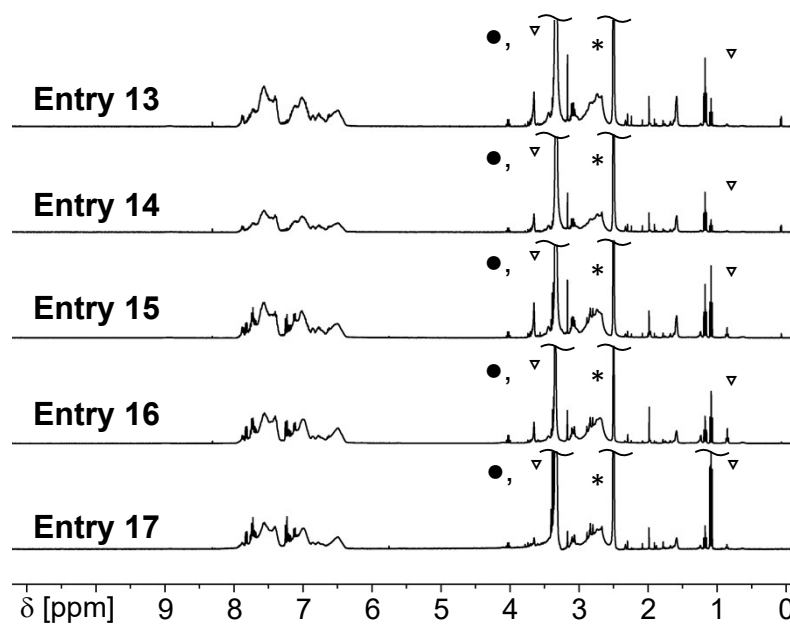

**Figure S8.**  $^1\text{H}$  NMR spectra of cationic polymerization of MBDO initiated by IBVE-OAc,  $\text{SnCl}_4$  and ethyl acetate (400 MHz, 26 °C,  $\text{DMSO-}d_6$ ). \*: DMSO, ●: water, ▽: diethyl ether.

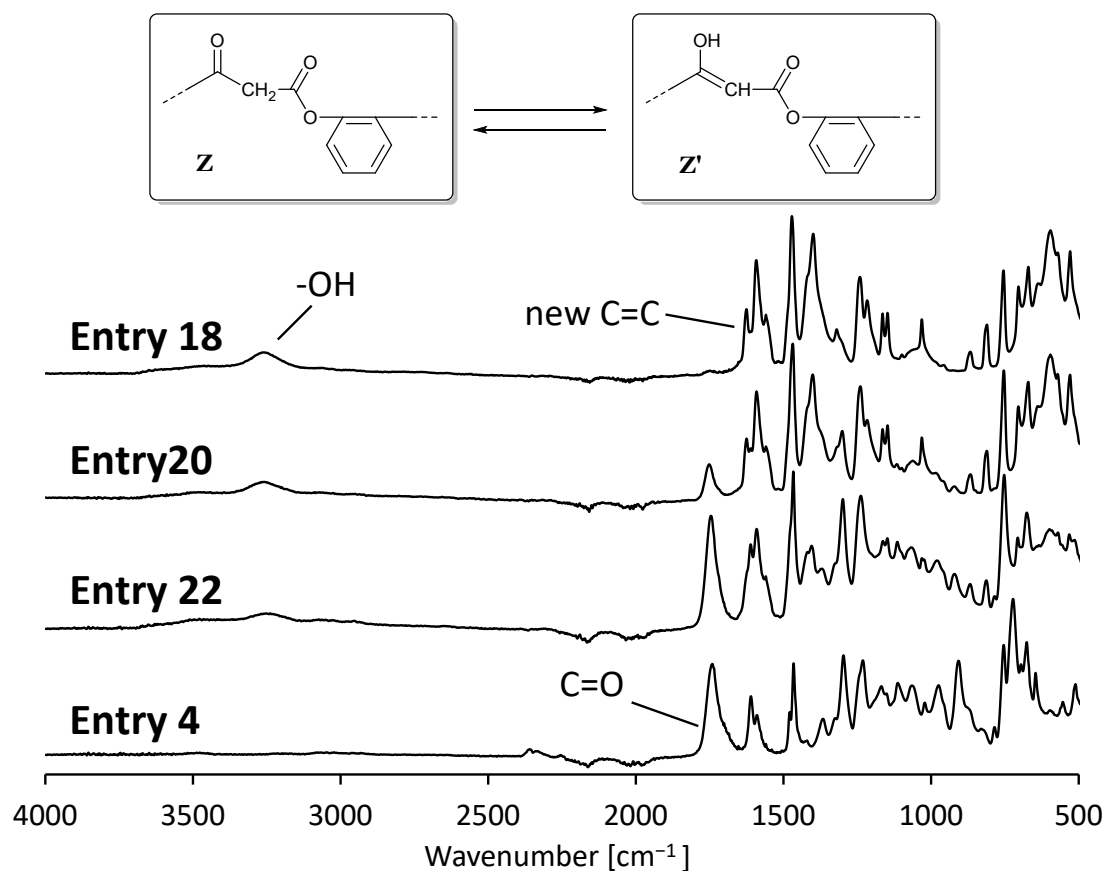

**Figure S9.** IR spectra of cationic polymerization of MBDO initiated by IBVE-OAc, EtAlCl<sub>2</sub> and ethyl acetate

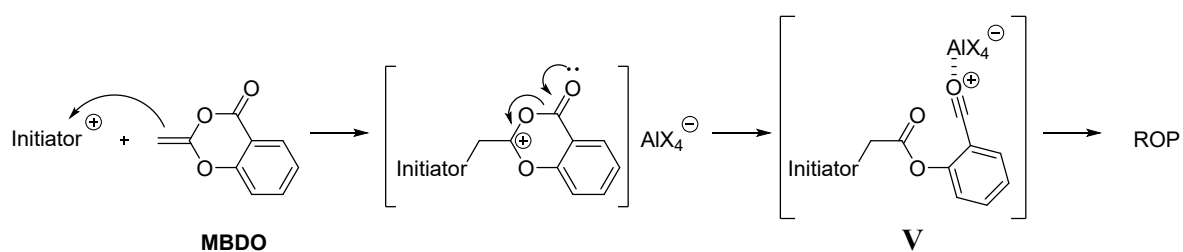

**Scheme S2.** Cationic polymerization of MBDO initiated with IBVE-OAc and EtAlCl<sub>2</sub> in the presence of ethyl acetate in toluene.

**Table S2.** Cationic polymerization of MBDO initiated with IBVE-OAc and EtAlCl<sub>2</sub> in the presence of ethyl acetate in toluene.

| Entry | Temp<br>[°C] | Conv.<br><sup>a</sup><br>[%] | Yield<br>[%] | $M_n^b$           | $\bar{D}^b$       | ROP <sup>c</sup><br>[%] |
|-------|--------------|------------------------------|--------------|-------------------|-------------------|-------------------------|
| 18    | − 78         | 53.8                         | 4.3          | 1600              | 1.21              | 100                     |
| S6    | − 63         | 60.9                         | 2.4          | N. D.             | N. D.             | 100                     |
| 19    | − 40         | 35.3                         | 3.3          | 1700              | 1.21              | 100                     |
| S7    | − 20         | 31.4                         | 2.2          | 600 <sup>d</sup>  | 1.06 <sup>d</sup> | 100                     |
| 20    | □ □ 0        | 35.1                         | 10.0         | 1600 <sup>d</sup> | 1.24 <sup>d</sup> | 73.4                    |
| 21    | □ □ 25       | 28.2                         | 11.3         | 1800 <sup>d</sup> | 1.36 <sup>d</sup> | 49.7                    |
| 22    | □ □ 40       | 23.4                         | 07.9         | 1800 <sup>d</sup> | 1.43 <sup>d</sup> | 42.2                    |
| S8    | □ □ 60       | 44.1                         | 02.2         | 1400 <sup>d</sup> | 1.53 <sup>d</sup> | 45.9                    |

<sup>a</sup>Determined by GC. <sup>b</sup>Determined by SEC (40.0 °C, THF). <sup>c</sup>Determined by <sup>13</sup>C NMR spectrum (100 MHz, 25 °C, DMSO-*d*<sub>6</sub>). <sup>d</sup>Insoluble in THF.

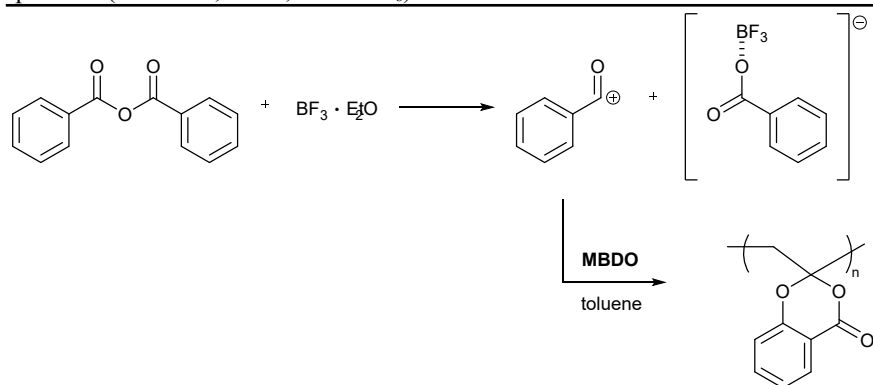

**Scheme S3.** Cationic polymerization of MBDO initiated with  $\text{BF}_3 \cdot \text{Et}_2\text{O}$  and benzoic anhydride in toluene.



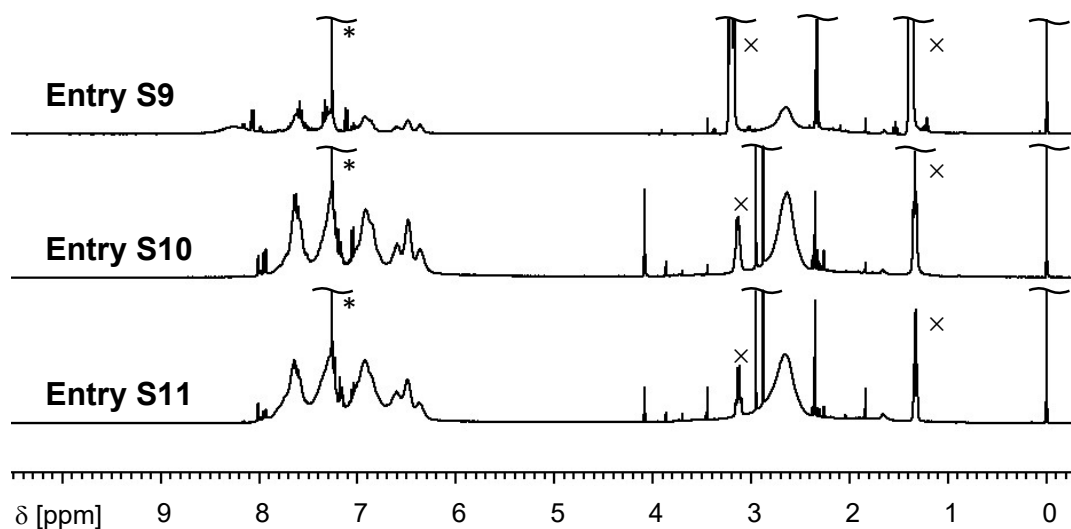

**Figure S10.**  $^1\text{H}$  NMR spectra of the polymers obtained via cationic polymerization of MBDO initiated with  $\text{BF}_3 \cdot \text{Et}_2\text{O}$  and benzoic anhydride in toluene. (400 MHz,  $\text{CDCl}_3$ , 25  $^\circ\text{C}$ ). \*:  $\text{CDCl}_3$ , x: diethyl ether.

**Table S3.** Cationic polymerization of MBDO initiated with  $\text{BF}_3 \cdot \text{Et}_2\text{O}$  and benzoic anhydride in toluene.

| Entry | Temp<br>[ $^\circ\text{C}$ ] | Conv.<br><sup>a</sup><br>[%] | Yield<br>[%] | $M_n^b$           | $\bar{D}^b$       |
|-------|------------------------------|------------------------------|--------------|-------------------|-------------------|
| S9    | − 78                         | 19.9                         | 14.9         | 2000 <sup>d</sup> | 1.23 <sup>d</sup> |
| S10   | 0                            | 38.5                         | 32.8         | 1200 <sup>d</sup> | 1.07 <sup>d</sup> |
| S11   | 40                           | 70.0                         | 14.9         | 1700 <sup>d</sup> | 1.46 <sup>d</sup> |

<sup>a</sup>Determined by GC. <sup>b</sup>Determined by SEC(40.0  $^\circ\text{C}$ , THF). <sup>c</sup>Determined by  $^{13}\text{C}$  NMR spectrum(400 MHz, 25  $^\circ\text{C}$ ,  $\text{DMSO}-d_6$ ). <sup>d</sup>Insoluble in THF.
